# Supplementary material for: Impact on stable chest pain pathways of CT fractional flow reserve
Source: PubMed Central journal article supplement — Heart. 2023 Apr 20;109(18):1380–6. doi: 10.1136/heartjnl-2022-321923 (PMC10511976; doi:10.1136/heartjnl-2022-321923), 2023-04-20
Supplement: heartjnl-2022-321923supp001.pdf [file heartjnl-2022-321923supp001.pdf]

## Supplementary material

### Exclusions

#### Free-text RACPC history exclusions for known existing CAD

The following regular expressions were used to exclude patients with known existing CAD based on the free-text history recorded at the RACPC.

**"(?<!failed )PCI|DES|CABG|(?<!renal) stent|oronary artery bypass|ngioplasty| single vessel"**

Identifies patients with mention of:

- PCI (not failed); OR
- DES (drug eluting stent); OR
- CABG; OR
- stent (not renal); OR
- oronary artery bypass (missing first letter to account for case sensitivity if term appears at start of sentence); OR
- ngioplasty (missing first letter to account for case sensitivity if term appears at start of sentence); OR
- single vessel (single vessel disease, would only be mentioned in this context)

**"MI|Mi"**

Identifies patients with mention of:

- MI (myocardial infarction); OR
- Mi (missed capitalisation of the "i")

These exclusions were checked manually to ensure instances including a patient name (i.e. "Miss [surname]") were not incorrectly flagged for exclusion, and were truly indicative of an MI.

#### ICD10 exclusions for known existing CAD

The following ICD10 codes were identified as being relevant for the exclusion of patients with known existing CAD previously seen as inpatients in our cohorts.

| Code | Description                                                |
|------|------------------------------------------------------------|
| I200 | Unstable angina                                            |
| I252 | Old myocardial infarction                                  |
| I219 | Acute myocardial infarction, unspecified                   |
| I214 | Acute subendocardial myocardial infarction                 |
| I211 | Acute transmural myocardial infarction of inferior wall    |
| I212 | Acute transmural myocardial infarction of other sites      |
| I210 | Acute transmural myocardial infarction of anterior wall    |
| I255 | Ischaemic cardiomyopathy                                   |
| I213 | Acute transmural myocardial infarction of unspecified site |
| I253 | Aneurysm of heart                                          |
| I248 | Other forms of acute ischaemic heart disease               |
| I201 | Angina pectoris with documented spasm                      |
| I249 | Acute ischaemic heart disease, unspecified                 |

|      |                                                            |
|------|------------------------------------------------------------|
| I229 | Subsequent myocardial infarction of unspecified site       |
| I240 | Coronary thrombosis not resulting in myocardial infarction |

#### OPCS exclusions for known existing CAD

The following OPCS codes were identified as being relevant for the exclusion of patients with known existing CAD previously seen as inpatients in our cohorts.

| Code | Description                                                                                                       |
|------|-------------------------------------------------------------------------------------------------------------------|
| K404 | Saphenous vein graft replacement of four or more coronary arteries                                                |
| K453 | Anastomosis of mammary artery to left anterior descending coronary artery                                         |
| K751 | Percutaneous transluminal balloon angioplasty and insertion of 1-2 drug-eluting stents into coronary artery       |
| K752 | Percutaneous transluminal balloon angioplasty and insertion of 3 or more drug-eluting stents into coronary artery |
| K491 | Percutaneous transluminal balloon angioplasty of one coronary artery                                              |
| K503 | Percutaneous transluminal injection of therapeutic substance into coronary artery NEC                             |
| K753 | Percutaneous transluminal balloon angioplasty and insertion of 1-2 stents into coronary artery                    |
| K402 | Saphenous vein graft replacement of two coronary arteries                                                         |
| K411 | Autograft replacement of one coronary artery NEC                                                                  |
| K498 | Other specified transluminal balloon angioplasty of coronary artery                                               |
| K518 | Other specified diagnostic transluminal operations on coronary artery                                             |
| K403 | Saphenous vein graft replacement of three coronary arteries                                                       |
| K493 | Percutaneous transluminal balloon angioplasty of bypass graft of coronary artery                                  |
| K512 | Intravascular ultrasound of coronary artery                                                                       |

#### Identification of diagnoses and investigations

##### A&E cardiovascular diagnoses

The following conditions were identified as being relevant for the classification of A&E attendances being for cardiovascular reasons.

| Description                          |
|--------------------------------------|
| ACS - Acute coronary syndrome        |
| Acute chest pain                     |
| Angina                               |
| Angina of effort                     |
| Cardiac chest pain                   |
| Chest pain                           |
| Chest pain at rest                   |
| Chest tightness                      |
| Ischaemic heart disease              |
| NSTEMI - Non-ST segment elevation MI |
| Unstable angina                      |

### Inpatient admission for cardiovascular reasons

The following ICD10 codes were identified as being relevant for the classification of inpatient admissions being for cardiovascular reasons.

| Code | Description                                                                                                                                                        |
|------|--------------------------------------------------------------------------------------------------------------------------------------------------------------------|
| Ix   | All codes beginning with 'I' are cardiovascular                                                                                                                    |
| R00x | Abnormalities of heart beat<br>Tachycardia, unspecified<br>Bradycardia, unspecified<br>Palpitations<br>Other and unspecified abnormalities of heart beat           |
| R01x | Cardiac murmurs and other cardiac sounds<br>Benign and innocent cardiac murmurs<br>Cardiac murmur, unspecified<br>Other cardiac sounds                             |
| R03x | Abnormal blood-pressure reading, without diagnosis<br>Elevated blood-pressure reading, without diagnosis of hypertension<br>Nonspecific low blood-pressure reading |
| R060 | Dyspnoea                                                                                                                                                           |
| R071 | Chest pain on breathing                                                                                                                                            |
| R073 | Other chest pain                                                                                                                                                   |
| R074 | Chest pain, unspecified                                                                                                                                            |
| R098 | Other specified symptoms and signs involving the circulatory and respiratory systems                                                                               |
| R55  | Syncope and collapse                                                                                                                                               |
| R570 | Cardiogenic shock                                                                                                                                                  |
| R931 | Abnormal findings on diagnostic imaging of heart and coronary circulation                                                                                          |
| R943 | Abnormal results of cardiovascular function studies                                                                                                                |

### Inpatient procedures

The following OPCS codes were identified as classifying procedures relevant to the study, carried out on an inpatient basis.

| Code | Description                                                                                                                                                                                                                                                                                                                                                                                                                                                   |
|------|---------------------------------------------------------------------------------------------------------------------------------------------------------------------------------------------------------------------------------------------------------------------------------------------------------------------------------------------------------------------------------------------------------------------------------------------------------------|
| K634 | Coronary arteriography using two catheters                                                                                                                                                                                                                                                                                                                                                                                                                    |
| K635 | Coronary arteriography using single catheter                                                                                                                                                                                                                                                                                                                                                                                                                  |
| K636 | Coronary arteriography NEC                                                                                                                                                                                                                                                                                                                                                                                                                                    |
| K49x | Percutaneous transluminal balloon angioplasty of one coronary artery<br>Percutaneous transluminal balloon angioplasty of multiple coronary arteries<br>Percutaneous transluminal balloon angioplasty of bypass graft of coronary artery<br>Percutaneous transluminal cutting balloon angioplasty of coronary artery<br>Other specified transluminal balloon angioplasty of coronary artery<br>Unspecified transluminal balloon angioplasty of coronary artery |
| K501 | Percutaneous transluminal laser coronary angioplasty                                                                                                                                                                                                                                                                                                                                                                                                          |
| K75x | Percutaneous transluminal balloon angioplasty and insertion of 1-2 drug-eluting stents into coronary artery<br>Percutaneous transluminal balloon angioplasty and insertion of 3 or more drug-eluting stents into coronary artery<br>Percutaneous transluminal balloon angioplasty and insertion of 1-2 stents into coronary artery<br>Percutaneous transluminal balloon angioplasty and insertion of 3 or more stents into                                    |

|      |                                                                                                                                                                                                                                                                                                                                                                                                     |
|------|-----------------------------------------------------------------------------------------------------------------------------------------------------------------------------------------------------------------------------------------------------------------------------------------------------------------------------------------------------------------------------------------------------|
|      | coronary artery NEC<br>Other specified percutaneous transluminal balloon angioplasty and insertion of stent into coronary artery<br>Unspecified percutaneous transluminal balloon angioplasty and insertion of stent into coronary artery                                                                                                                                                           |
| K40x | Saphenous vein graft replacement of one coronary artery<br>Saphenous vein graft replacement of two coronary arteries<br>Saphenous vein graft replacement of three coronary arteries<br>Saphenous vein graft replacement of four or more coronary arteries<br>Other specified saphenous vein graft replacement of coronary artery<br>Unspecified saphenous vein graft replacement of coronary artery |
| K41x | Autograft replacement of one coronary artery NEC<br>Autograft replacement of two coronary arteries NEC<br>Autograft replacement of three coronary arteries NEC<br>Autograft replacement of four or more coronary arteries NEC<br>Other specified other autograft replacement of coronary artery<br>Unspecified other autograft replacement of coronary artery                                       |
| K42x | Allograft replacement of one coronary artery<br>Allograft replacement of two coronary arteries<br>Allograft replacement of three coronary arteries<br>Allograft replacement of four or more coronary arteries<br>Other specified allograft replacement of coronary artery<br>Unspecified allograft replacement of coronary artery                                                                   |
| K43x | Prosthetic replacement of one coronary artery<br>Prosthetic replacement of two coronary arteries<br>Prosthetic replacement of three coronary arteries<br>Prosthetic replacement of four or more coronary arteries<br>Other specified prosthetic replacement of coronary artery<br>Unspecified prosthetic replacement of coronary artery                                                             |
| K44x | Replacement of coronary arteries using multiple methods<br>Revision of replacement of coronary artery<br>Other specified other replacement of coronary artery<br>Unspecified other replacement of coronary artery                                                                                                                                                                                   |

#### Inpatient events

The following ICD10 codes were identified as classifying events relevant to the study, occurring on an inpatient basis.

| Code | Description                                                                                                                                                                                                                                                                                                                                                        |
|------|--------------------------------------------------------------------------------------------------------------------------------------------------------------------------------------------------------------------------------------------------------------------------------------------------------------------------------------------------------------------|
| I21x | Acute myocardial infarction<br>Acute transmural myocardial infarction of anterior wall<br>Acute transmural myocardial infarction of inferior wall<br>Acute transmural myocardial infarction of other sites<br>Acute transmural myocardial infarction of unspecified site<br>Acute subendocardial myocardial infarction<br>Acute myocardial infarction, unspecified |
| I22x | Subsequent myocardial infarction<br>Subsequent myocardial infarction of anterior wall<br>Subsequent myocardial infarction of inferior wall<br>Subsequent myocardial infarction of other sites                                                                                                                                                                      |

|  |                                                      |
|--|------------------------------------------------------|
|  | Subsequent myocardial infarction of unspecified site |
|--|------------------------------------------------------|

#### Radiology Information System – procedures

The following exam names were identified as classifying relevant investigations, as recorded in the RIS dataset.

| Procedure     | Exam Name                                |
|---------------|------------------------------------------|
| CTCA          | CT Cardiac Angiogram Coronary            |
| CTCA          | CT Cardiac Cor Artery Calcium Scoring    |
| CTCA          | CT Cardiac Gated Function With Contrast  |
| Stress NMPS   | NM Mps Tf Stress Gated                   |
| Rest NMPS     | NM Mps Tf Rest Gated                     |
| Angiography   | Cardiac Angio Coronaries                 |
| Angiography   | Cardiac Angio Lt Ventricle and Cor A     |
| Pressure wire | Cardiac Pressure Wire and Cath Insertion |
| PCI           | Primary Pc coronary intervention         |
| PCI           | Cardiac Angio Coronary Stent             |
| PCI           | Cardiac Pressure Wire and Pci            |
| MRI           | MRI Card Morphology Func With Contrast   |
| MRI           | MRI Card Morph Func Velocity Stress Cont |
| MRI           | MRI Card Morph Func Velocity With Cont   |
| MRI           | MRI Card Morphology Function Velocity    |
| IVUS          | Intravascular Ultrasound                 |
| OCT           | OCT Coronary artery Fluoro guided Right  |

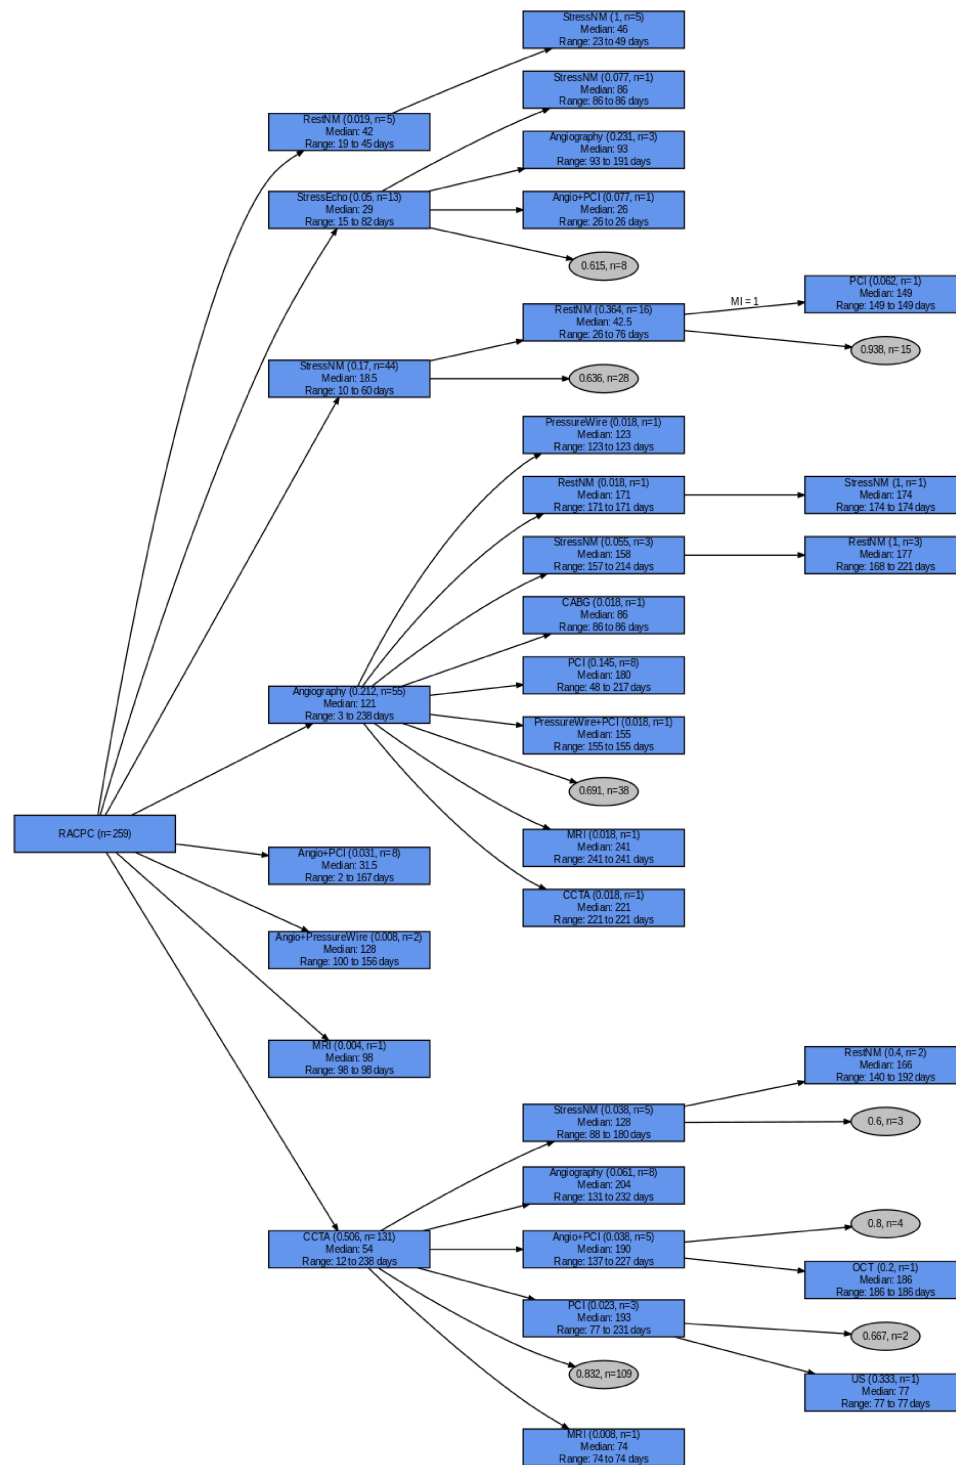

Figure S1. Pre-fractional flow reserve computed tomography (FFR<sub>CT</sub>); chronological breakdown of investigations between Rapid Access Chest Pain Clinic (RACPC) attendance and endpoint.

Abbreviations: CTCA, computed tomography coronary angiography; PCI, percutaneous coronary intervention; CABG, coronary artery bypass grafting; NM, nuclear medicine; MRI, magnetic resonance imaging; OCT, optical coherence tomography; US, ultrasound.

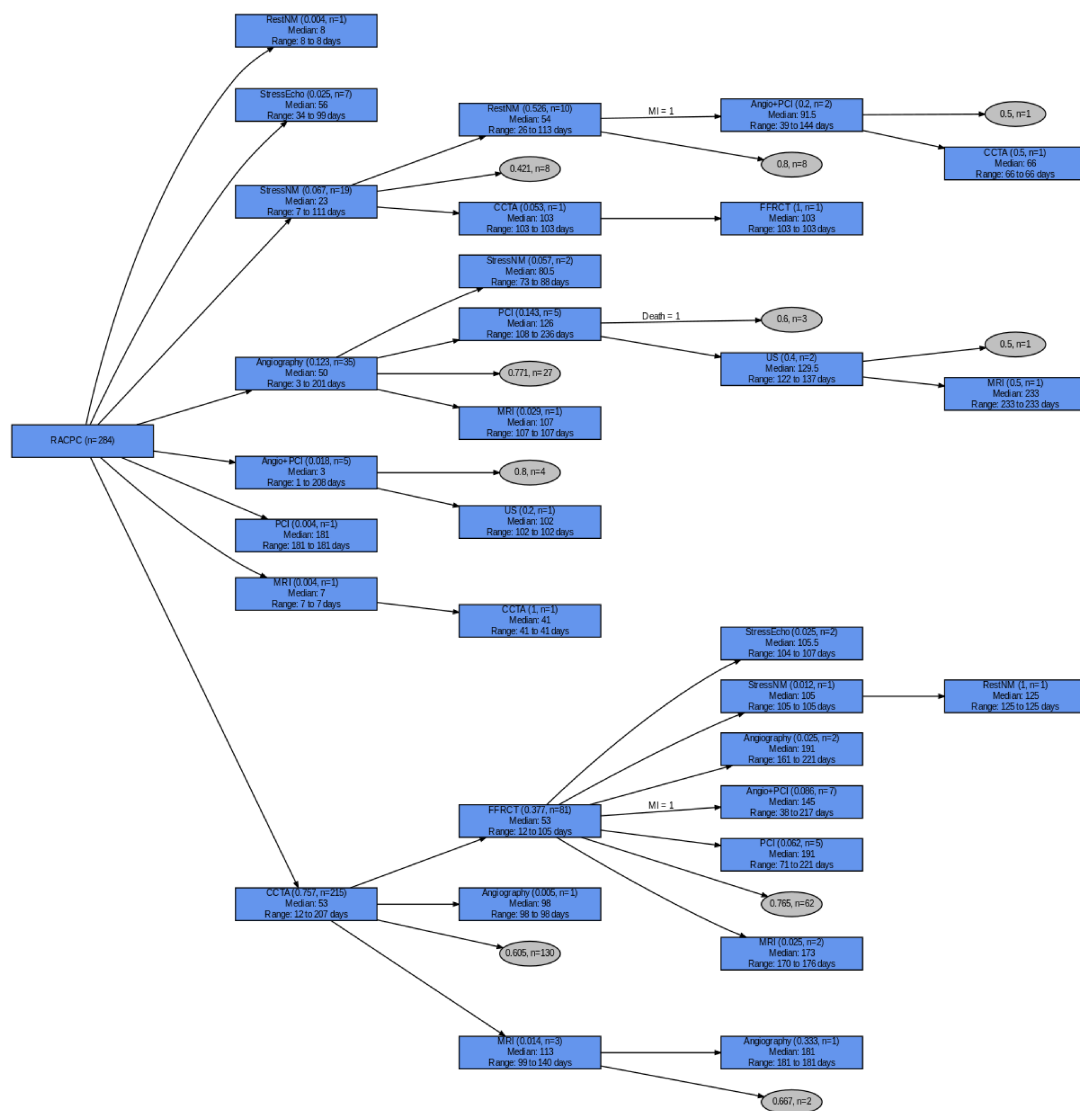

Figure S2. Post-fractional flow reserve computed tomography (FFR<sub>CT</sub>); chronological breakdown of investigations between Rapid Access Chest Pain Clinic (RACPC) attendance and endpoint.

Abbreviations: CTCA, computed tomography coronary angiography; PCI, percutaneous coronary intervention; NM, nuclear medicine; MRI, magnetic resonance imaging; US, ultrasound.
